# Supplementary material for: Paired Analysis of D-Dimer and Its Correlated Hemostatic Parameters in 30 Dogs with Neoplasms after Tumorectomy
Source: MDPI journal article supplement (doi:10.3390/ani13060969), 2023-03-07
Supplement: s1 [file s1]

## animals-2210147 Supplementary Information

**Table S1.** Signalment of the control dogs.

|    | Breed            | Reproductive status | Age (years) | Body weight (kg) | D-dimer ( $\mu\text{g/mL}$ ) |
|----|------------------|---------------------|-------------|------------------|------------------------------|
| 1  | Beagle           | Male intact         | 3.5         | 10               | 0.1                          |
| 2  | Beagle           | Male castrated      | 2.0         | 12               | 0.1                          |
| 3  | Beagle           | Male castrated      | 4.0         | 11               | 0.1                          |
| 4  | Beagle           | Female spayed       | 2.0         | 9                | 0.1                          |
| 5  | Beagle           | Female spayed       | 3.8         | 10               | 0.1                          |
| 6  | Beagle           | Female spayed       | 4.5         | 8                | 0.1                          |
| 7  | Border Collie    | Male castrated      | 2.5         | 22               | 0.1                          |
| 8  | Border Collie    | Male castrated      | 3.0         | 25               | 0.1                          |
| 9  | Border Collie    | Male castrated      | 4.0         | 17               | 0.1                          |
| 10 | Border Collie    | Female spayed       | 3.5         | 19               | 0.1                          |
| 11 | Formosan         | Male intact         | 1.8         | 50               | 0.1                          |
| 12 | Formosan         | Male intact         | 2.6         | 55               | 0.1                          |
| 13 | Formosan         | Female intact       | 1.3         | 55               | 0.1                          |
| 14 | Formosan         | Female intact       | 1.3         | 55               | 0.1                          |
| 15 | Formosan         | Female intact       | 1.5         | 52               | 0.1                          |
| 16 | Formosan         | Female intact       | 3.0         | 45               | 0.1                          |
| 17 | Formosan         | Female intact       | 3.5         | 50               | 0.1                          |
| 18 | Formosan         | Female intact       | 3.5         | 50               | 0.1                          |
| 19 | Formosan         | Female intact       | 4.8         | 50               | 0.1                          |
| 20 | Formosan         | Female intact       | 5.5         | 48               | 0.1                          |
| 21 | Formosan         | Female spayed       | 6.0         | 45               | 0.1                          |
| 22 | Formosan         | Female spayed       | 6.0         | 43               | 0.1                          |
| 23 | Golden Retriever | Female spayed       | 2.0         | 27               | 0.1                          |
| 24 | Irish Setter     | Male intact         | 2.5         | 28               | 0.1                          |
| 25 | Irish Setter     | Male castrated      | 2.5         | 30               | 0.1                          |
| 26 | Mixed            | Male castrated      | 2.5         | 22               | 0.1                          |
| 27 | Mixed            | Male castrated      | 4.0         | 17               | 0.1                          |
| 28 | Mixed            | Female spayed       | 4.0         | 22               | 0.1                          |
| 29 | Mixed            | Female spayed       | 6.0         | 19               | 0.1                          |
| 30 | Standard Poodle  | Male castrated      | 2.5         | 18               | 0.1                          |

**Table S2. Signalment and the results of the hemostatic parameters before and after tumorectomy in dogs with tumors.** TEG G, thromboelastography G; aPPT, activated partial thromboplastin time; PT, prothrombin time; PLT, platelet count; MGT, mammary gland tumor; cMCT, cutaneous mast cell tumor; SCC, squamous cell carcinoma; OSA, osteosarcoma; TVT, transmissible venereal tumor; AST, anal sac tumor; FSA, fibrosarcoma; STS, soft tissue sarcoma. .

| No. | Breed                 | Reproductive status | Age (years) | Body weight (kg) | Tumor type        | Benign/ Malignant | TNM    | WHO stage      | D-dimer (µg/mL) |                | TEG G (dyn/cm <sup>2</sup> ) |                | aPTT (sec)    |                | PT (sec)      |                | Fibrinogen (g/L) |                | PLT (10 <sup>9</sup> ) |                |
|-----|-----------------------|---------------------|-------------|------------------|-------------------|-------------------|--------|----------------|-----------------|----------------|------------------------------|----------------|---------------|----------------|---------------|----------------|------------------|----------------|------------------------|----------------|
|     |                       |                     |             |                  |                   |                   |        |                | Pre-treatment   | Post-treatment | Pre-treatment                | Post-treatment | Pre-treatment | Post-treatment | Pre-treatment | Post-treatment | Pre-treatment    | Post-treatment | Pre-treatment          | Post-treatment |
| 1   | Mixed                 | Female intact       | 10          | 16               | MGT               | Malignant         | T2N0M0 | II             | 2.5             | 1.4            | 6.5                          | 7.3            | 8             | 8.1            | 6.3           | 6.2            | 7.6              | 3.2            | 297                    | 310            |
| 2   | Mixed                 | Male intact         | 11          | 27.5             | Lipoma            | Benign            | ---    | ---            | 0.2             | 0.2            | 3.2                          | 4.3            | 9.2           | 8.2            | 5.3           | 4.5            | 8.1              | 3.9            | 277                    | 284            |
| 3   | Doberman Pinscher     | Male castrated      | 14          | 43.6             | cMCT <sup>1</sup> | High              | ---    | I <sup>2</sup> | 0.8             | 0.3            | 20.4                         | 15.3           | 11.3          | 8.9            | 5.2           | 5.7            | 10.3             | 9.2            | 378                    | 347            |
| 4   | Mixed                 | Male intact         | 8           | 26               | Melanoma          | Malignant         | T1N1M0 | III            | 4.0             | 2.1            | 10.7                         | 9.2            | 9.8           | 5.4            | 4.5           | 5.3            | 11.6             | 8.2            | 293                    | 256            |
| 5   | Mixed                 | Female spayed       | 12          | 22.7             | MGT               | Benign            | ---    | ---            | 0.8             | 0.5            | 16.3                         | 18.4           | 6.2           | 8.4            | 7.6           | 6.5            | 7.3              | 6.9            | 462                    | 428            |
| 6   | Mixed                 | Female intact       | 13          | 13               | cMCT              | Low               | ---    | I              | 0.2             | 0.3            | 9.7                          | 10.3           | 7.9           | 9.1            | 5.4           | 5.1            | 8.8              | 11.3           | 384                    | 337            |
| 7   | Mixed                 | Male intact         | 10          | 26.5             | SCC               | Malignant         | T1N0M0 | I              | 0.2             | 0.2            | 23.2                         | 22.4           | 10.7          | 9.6            | 3.4           | 3.7            | 9.5              | 7.2            | 376                    | 257            |
| 8   | Retrievers (Labrador) | Female spayed       | 14          | 41.2             | MGT               | Benign            | ---    | ---            | 0.3             | 0.1            | 15.9                         | 18.2           | 10.4          | 8.6            | 7.6           | 8              | 10.2             | 7.3            | 392                    | 347            |
| 9   | Retrievers (Golden)   | Male intact         | 9           | 27.3             | cMCT              | High              | ---    | I              | 4               | 2.1            | 29.3                         | 23.2           | 9.5           | 9.3            | 7.3           | 6.7            | 8.3              | 7.4            | 283                    | 279            |
| 10  | Mixed                 | Male castrated      | 11          | 21.8             | OSA               | Malignant         | T1N0M0 | IA             | 0.8             | 0.3            | 13.3                         | 10.9           | 10.4          | 10.7           | 8.2           | 6.2            | 10.7             | 7.2            | 356                    | 377            |
| 11  | Miniature Poodle      | Female intact       | 10          | 6.3              | Melanoma          | Malignant         | T1N0M0 | I              | 0.5             | 0.2            | 32.6                         | 23.6           | 7.4           | 6.8            | 8.1           | 5.3            | 3.2              | 2.1            | 285                    | 273            |
| 12  | Mixed                 | Female intact       | 11          | 23.5             | cMCT              | Low               | ---    | I              | 0.4             | 0.1            | 10.3                         | 11.7           | 11.1          | 9.5            | 6.3           | 6.9            | 7.6              | 5.2            | 382                    | 362            |
| 13  | Mixed                 | Male castrated      | 15          | 38.3             | TVT               | Benign            | ---    | ---            | 1.2             | 0.5            | 20.8                         | 17.2           | 7.6           | 7.4            | 4.3           | 3.7            | 8.5              | 7.7            | 297                    | 301            |
| 14  | Mixed                 | Female intact       | 7           | 18               | MGT               | Malignant         | T3N1M0 | IV             | 3.2             | 1.9            | 8.3                          | 18.3           | 7.2           | 7.1            | 7.1           | 4.9            | 6.3              | 4.2            | 348                    | 332            |
| 15  | Mixed                 | Female castrated    | 13          | 23.2             | AST               | Malignant         | T1N0M0 | I              | 0.6             | 0.2            | 20.3                         | 22.9           | 10.2          | 9.8            | 8.8           | 7.9            | 9.5              | 7.4            | 452                    | 421            |
| 16  | Mixed                 | Female spayed       | 10          | 30               | cMCT              | Low               | ---    | I              | 0.5             | 0.1            | 17.5                         | 9.3            | 8.2           | 7.3            | 5.4           | 6.1            | 6.3              | 3.5            | 61                     | 93             |
| 17  | Mixed                 | Female intact       | 8           | 3.7              | MGT               | Benign            | ---    | ---            | 0.1             | 0.1            | 10.2                         | 6.8            | 8.3           | 8.0            | 7.3           | 6.6            | 9.2              | 6.3            | 410                    | 616            |
| 18  | Mixed                 | Male intact         | 8           | 10               | Melanoma          | Malignant         | T2N0M0 | II             | 4.3             | 2.8            | 5.3                          | 5.7            | 9.5           | 8.7            | 5.3           | 4.2            | 7.3              | 3.2            | 361                    | 382            |
| 19  | Mixed                 | Female spayed       | 7           | 11.9             | Lipoma            | Benign            | ---    | ---            | 0.1             | 0.1            | 18.6                         | 12.3           | 10.1          | 9.3            | 6.3           | 6.8            | 5.3              | 2.1            | 302                    | 253            |
| 20  | Mixed                 | Female spayed       | 10          | 5.52             | FSA               | Malignant         | T3N1M1 | IV             | 0.1             | 0.1            | 16.3                         | 10.2           | 9.2           | 8.3            | 7.8           | 8.0            | 2.3              | 2.1            | 89                     | 163            |
| 21  | Yorkshire Terrier     | Male castrated      | 6           | 4.28             | STS               | Malignant         | T3N1M1 | IV             | 6.3             | 3.7            | 6.3                          | 5.8            | 8.9           | 8.4            | 6.3           | 6.3            | 11.2             | 7.9            | 356                    | 382            |

|    |                       |               |    |      |                   |           |        |     |     |     |      |      |      |      |     |     |     |     |     |     |
|----|-----------------------|---------------|----|------|-------------------|-----------|--------|-----|-----|-----|------|------|------|------|-----|-----|-----|-----|-----|-----|
| 22 | Retrievers (Labrador) | Female spayed | 11 | 12.5 | Melanoma          | Malignant | T1N0M0 | I   | 0.1 | 0.1 | 23.7 | 15.3 | 6.3  | 6.6  | 7.7 | 8.1 | 8.7 | 4.6 | 513 | 462 |
| 23 | Siberian Huskies      | Female spayed | 14 | 21.6 | cMCT              | High      | ---    | II  | 6.3 | 3.2 | 15.3 | 11.2 | 8.3  | 7.2  | 7.2 | 7.6 | 4.3 | 4.8 | 386 | 427 |
| 24 | Siberian Huskies      | Male intact   | 10 | 23   | AST               | Malignant | T2N0M0 | II  | 3.1 | 1.6 | 10.1 | 6.3  | 7.7  | 7.2  | 5.4 | 6.2 | 6.8 | 4.2 | 378 | 372 |
| 25 | Miniature Dachshunds  | Female intact | 13 | 6.9  | MGT               | Malignant | T3N0M0 | III | 3.8 | 2.2 | 14.8 | 7.4  | 8.6  | 8.7  | 6.3 | 7.1 | 8.2 | 5.7 | 149 | 264 |
| 26 | Siberian Huskies      | Female spayed | 9  | 26.7 | MGT               | Benign    | ---    | --- | 1.2 | 0.2 | 8.7  | 6.2  | 9.3  | 10.2 | 8.3 | 8.6 | 3.2 | 3.4 | 319 | 386 |
| 27 | Schnauzers            | Female spayed | 10 | 21.6 | cMCT              | Low       | ---    | II  | 0.1 | 0.1 | 9.3  | 8.4  | 10.3 | 9.8  | 7.6 | 8.2 | 5.2 | 3.7 | 334 | 234 |
| 28 | Siberian Huskies      | Male intact   | 10 | 23   | STS               | Malignant | T3N1M0 | III | 3.2 | 2.1 | 12.1 | 8.3  | 8.5  | 8.6  | 5.5 | 6.3 | 3.2 | 3.1 | 298 | 243 |
| 29 | Mixed                 | Female spayed | 9  | 19   | Thyroid carcinoma | Malignant | T3N1M0 | III | 4.1 | 1.7 | 6.2  | 7.3  | 10.3 | 8.4  | 9.2 | 8.5 | 5.2 | 3.1 | 426 | 344 |
| 30 | Mixed                 | Male intact   | 11 | 17.3 | AST               | Malignant | T2N0M0 | II  | 0.1 | 0.2 | 14.3 | 9.6  | 9.4  | 10.3 | 6.7 | 6.8 | 7.2 | 6.1 | 372 | 421 |

<sup>1</sup> Cutaneous mast cell tumors are classified as low-grade or high-grade based on morphological features and proliferative activity [1]; <sup>2</sup> The clinical stage of mast cell tumors is according to the rules based on clinical and histological features [2].

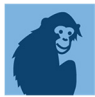

**Table S3.** Distribution of 30 dogs with tumors based on thromboelastography G determined coagulability following tumorectomy.

| TEG G ( $\times 10^3$ dyn/cm <sup>2</sup> ) | Before treatment | After treatment |
|---------------------------------------------|------------------|-----------------|
| Hyper ( $> 7.2$ )                           | 25 (83.3 %)      | 24 (80.0 %)     |
| Normal (3.2–7.2)                            | 5 (16.7 %)       | 6 (20.0 %)      |
| Hypo ( $< 3.2$ )                            | 0 (0.0 %)        | 0 (0.0 %)       |
| Total (n)                                   | 30 (100 %)       | 30 (100 %)      |

## Reference

1. Kiupel, M.; Webster, J.D.; Bailey, K.L.; Best, S.; DeLay, J.; Detrisac, C.J.; Fitzgerald, S.D.; Gamble, D.; Ginn, P.E.; Goldschmidt, M.H.; et al. Proposal of a 2-tier histologic grading system for canine cutaneous mast cell tumors to more accurately predict biological behavior. *Vet Pathol* **2011**, *48*, 147–155. <https://doi.org/10.1177/0300985810386469>.
2. Horta, R.S.; Lavalle, G.E.; Monteiro, L.N.; Souza, M.C.C.; Cassali, G.D.; Araújo, R.B. Assessment of Canine Mast Cell Tumor Mortality Risk Based on Clinical, Histologic, Immunohistochemical, and Molecular Features. *Vet Pathol* **2018**, *55*, 212–223. <https://doi.org/10.1177/0300985817747325>.
